# Supplementary material
Source: MDPI journal article supplement (https://www.mdpi.com/2075-4701/13/2/270)
Supplement: s1 [file s1]

## Article

# Accurate detection of $\text{Cd}^{2+}$ and $\text{Pb}^{2+}$ concentrations in soils by stripping voltammetry peak areas under the mutual interference of multiple heavy metals

Wenshuai Ye<sup>1†</sup>, Ning Liu<sup>2†</sup>, Guo Zhao<sup>3</sup> and Gang Liu<sup>1,2\*</sup><sup>†</sup>These authors share first authorship.<sup>1</sup> Key Lab of Smart Agriculture Systems, Ministry of Education, China Agricultural University, Beijing 100083, China<sup>2</sup> Key Laboratory of Agricultural Information Acquisition Technology, Ministry of Agriculture and Rural Affairs of China, China Agricultural University, Beijing 100083, China<sup>3</sup> College of Artificial Intelligence, Nanjing Agricultural University, Nanjing 210031, China

\* Correspondence: pac@cau.edu.cn

## 2. Materials and Methods

### 2.2. Preparation of the Bi/GCE

First, the GCE was polished using alumina powder (0.05 mm) on polishing paper made of deerskin. Then the GCE was sequentially cleaned by ultrasonic in 0.1 M  $\text{HNO}_3$ , 50% ethanol, and Millipore-Q water for 1 min, respectively, and dried using  $\text{N}_2$  gas. Afterward, 300  $\mu\text{g/L}$  of  $\text{Bi}^{3+}$  was added into the 25 mL of buffer solution (0.2 M, pH 5.0). Finally, the  $\text{Bi}^{3+}$ , together with other HMIs, were deposited into the surface of GCE at a potential of  $-1.3$  V during the electrodeposition process, obtaining the in-situ bismuth film modified GCE (Bi/GCE).

### 2.3. SWASV measurement

The optimal experimental conditions for detection of  $\text{Cd}^{2+}$  and  $\text{Pb}^{2+}$  concentration using Bi/GCE by SWASV had been explored in our previous study [1], the optimal concentration of  $\text{Bi}^{3+}$  was 300  $\mu\text{g/L}$ , the optimal pH value was 5.0, the optimal deposition potential was  $-1.3$  V, and the optimal deposition time was 180 s. The sensor was characterized by CV analysis, and the specific CV plots were shown in Figure S1. The CV plots demonstrated that the electrode has considerable reversibility and can be used to detect the electrochemical signals of  $\text{Zn}^{2+}$ ,  $\text{Cd}^{2+}$ ,  $\text{Pb}^{2+}$ ,  $\text{Bi}^{3+}$ , and  $\text{Cu}^{2+}$ . In addition, the repeatability, stability and electroanalytical performance of Bi/GCE had been validated, as presented in Fig S2, which demonstrated that the obtained SWASV dataset was reliable to build machine learning detection models.

Before performing SWASV measurements, dissolved oxygen was removed from the test solution by blowing  $\text{N}_2$  gas for 2 mins. The main steps of SWASV were as follows. The HMIs were electro-deposited into the GCE surface for 180 s at the potential of  $-1.3$  V, accompanied by stirring at a speed of 300 r/min. After an equilibration period for 10 s, the deposited HMIs were stripped off from the GCE surface by applying the square-wave excitation potential in the range of  $-1.4$  to  $0.2$  V to obtain stripping currents. The square-wave frequency, potential amplitude, and potential increment of the excitation potential were 25 Hz, 25 mV, and 5 mV, respectively. A total of 320 data points were collected in the stripping potential range of  $-1.4$  to  $0.2$  V for one SWASV data curve due to the potential increment of 5 mV.

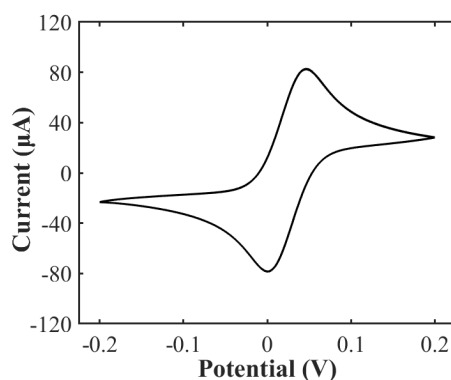

**Figure S1.** CV curve of the bare GCE in the 5 mM  $[\text{Fe}(\text{CN})_6]^{3-/4-}$  solution with 0.1 M KCl.

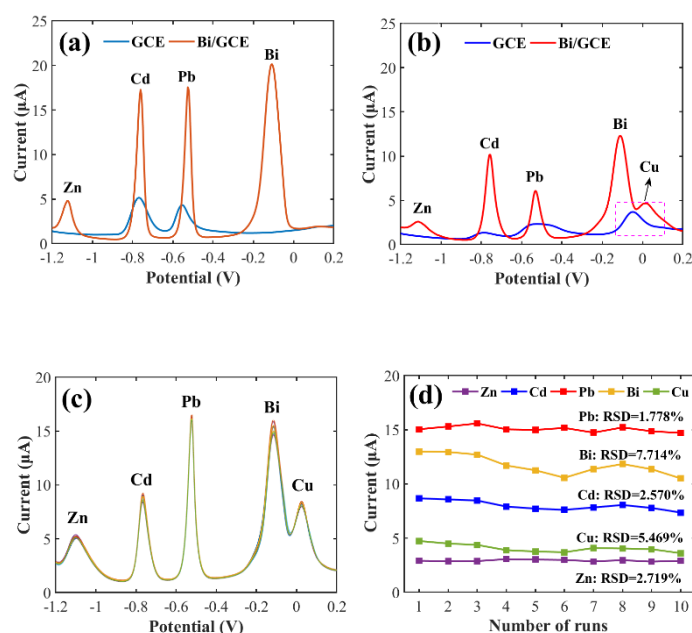

**Figure S2.** SWASV responses of (a) 20  $\mu\text{g/L}$   $\text{Zn}^{2+}$ ,  $\text{Cd}^{2+}$ , and  $\text{Pb}^{2+}$  on GCE and Bi/GCE, (b) 20  $\mu\text{g/L}$   $\text{Zn}^{2+}$ ,  $\text{Cd}^{2+}$ ,  $\text{Pb}^{2+}$ , and  $\text{Cu}^{2+}$  on GCE and Bi/GCE, and (c-d) 40  $\mu\text{g/L}$   $\text{Zn}^{2+}$ ,  $\text{Cd}^{2+}$ ,  $\text{Pb}^{2+}$ , and  $\text{Cu}^{2+}$  on Bi/GCE for ten repetitive measurements.

#### 2.4. Establishment of Experimental Datasets

**Table S1.** the excoigation of 64 sets of orthogonal experiments by the  $\text{L}_{64}(8^4)$  orthogonal table.

| Experiment number | Concentrations of heavy metal ions ( $\mu\text{g/L}$ ) |                  |                  |                  |
|-------------------|--------------------------------------------------------|------------------|------------------|------------------|
|                   | $\text{Cd}^{2+}$                                       | $\text{Pb}^{2+}$ | $\text{Cu}^{2+}$ | $\text{Zn}^{2+}$ |
| 1                 | 2                                                      | 5                | 0                | 0                |
| 2                 | 2                                                      | 25               | 25               | 50               |
| 3                 | 2                                                      | 50               | 50               | 100              |
| 4                 | 2                                                      | 75               | 75               | 150              |
| 5                 | 2                                                      | 100              | 100              | 200              |
| 6                 | 2                                                      | 125              | 125              | 250              |
| 7                 | 2                                                      | 150              | 150              | 300              |
| 8                 | 2                                                      | 175              | 175              | 350              |
| 9                 | 5                                                      | 50               | 0                | 50               |

|    |    |     |     |     |
|----|----|-----|-----|-----|
| 10 | 5  | 75  | 25  | 0   |
| 11 | 5  | 5   | 50  | 150 |
| 12 | 5  | 25  | 75  | 100 |
| 13 | 5  | 150 | 100 | 250 |
| 14 | 5  | 175 | 125 | 200 |
| 15 | 5  | 100 | 150 | 350 |
| 16 | 5  | 125 | 175 | 300 |
| 17 | 10 | 100 | 0   | 100 |
| 18 | 10 | 125 | 25  | 150 |
| 19 | 10 | 150 | 50  | 0   |
| 20 | 10 | 175 | 75  | 50  |
| 21 | 10 | 5   | 100 | 300 |
| 22 | 10 | 25  | 125 | 350 |
| 23 | 10 | 50  | 150 | 200 |
| 24 | 10 | 75  | 175 | 250 |
| 25 | 15 | 150 | 0   | 150 |
| 26 | 15 | 175 | 25  | 100 |
| 27 | 15 | 100 | 50  | 50  |
| 28 | 15 | 125 | 75  | 0   |
| 29 | 15 | 50  | 100 | 350 |
| 30 | 15 | 75  | 125 | 300 |
| 31 | 15 | 5   | 150 | 250 |
| 32 | 15 | 25  | 175 | 200 |
| 33 | 20 | 125 | 0   | 200 |
| 34 | 20 | 100 | 25  | 250 |
| 35 | 20 | 175 | 50  | 300 |
| 36 | 20 | 150 | 75  | 350 |
| 37 | 20 | 25  | 100 | 0   |
| 38 | 20 | 5   | 125 | 50  |
| 39 | 20 | 75  | 150 | 100 |
| 40 | 20 | 50  | 175 | 150 |
| 41 | 25 | 175 | 0   | 250 |
| 42 | 25 | 150 | 25  | 200 |
| 43 | 25 | 125 | 50  | 350 |
| 44 | 25 | 100 | 75  | 300 |
| 45 | 25 | 75  | 100 | 50  |
| 46 | 25 | 50  | 125 | 0   |
| 47 | 25 | 25  | 150 | 150 |
| 48 | 25 | 5   | 175 | 100 |
| 49 | 30 | 25  | 0   | 300 |
| 50 | 30 | 5   | 25  | 350 |
| 51 | 30 | 75  | 50  | 200 |
| 52 | 30 | 50  | 75  | 250 |
| 53 | 30 | 125 | 100 | 100 |
| 54 | 30 | 100 | 125 | 150 |
| 55 | 30 | 175 | 150 | 0   |
| 56 | 30 | 150 | 175 | 50  |
| 57 | 35 | 75  | 0   | 350 |
| 58 | 35 | 50  | 25  | 300 |
| 59 | 35 | 25  | 50  | 250 |

|           |    |     |     |     |
|-----------|----|-----|-----|-----|
| <b>60</b> | 35 | 5   | 75  | 200 |
| <b>61</b> | 35 | 175 | 100 | 150 |
| <b>62</b> | 35 | 75  | 125 | 100 |
| <b>63</b> | 35 | 125 | 150 | 50  |
| <b>64</b> | 35 | 100 | 175 | 0   |

## 2.6. Detection models

For multivariate regression, it was representation samples that chosen to build model was important. Based on the Euclidean distance between two samples, the K-S algorithm, a kind of unsupervised selection methods, was often used in the area of chemometrics for presenting good results, and for being easy to be applied and understood[2,3]. The process of K-S algorithm was as follows. first, the samples with the largest Euclidean distance in the sample were calculated and determined as the calibration set, and then repeatedly from the remaining samples selected the samples that had the shortest and largest distance with calibration set. Until the number of samples met the requirements of calibration set. Calculation formula (1) as follow.

$$d_x(p, q) = \sqrt{\sum_{j=1}^N [x_p(j) - x_q(j)]^2} \quad p, q \in [1, N] \quad (S1)$$

The SPXY algorithm, a kind of supervised selection, required all samples to be labeled, sequentially, the information provided by which could efficiently select representative samples[4]. The SPXY algorithm was developed on the basis of K-S algorithm, and the difference from K-S algorithm was that SPXY algorithm took both x (five peak heights or peak areas) and y (the real concentrations of target ions) variables into account when calculating the distance between samples. Calculation formula (2,3) as follow[5]. Therefore, SPXY were used to efficient select representative samples to accurately detective Cd<sup>2+</sup> and Pb<sup>2+</sup> concentration under Zn<sup>2+</sup> and Cu<sup>2+</sup> interference.

$$d_y(p, q) = \sqrt{(y_p - y_q)^2} \quad p, q \in [1, N] \quad (S2)$$

$$d_{xy}(p, q) = \frac{d_x(p, q)}{\max_{p, q \in [1, N]} d_x(p, q)} + \frac{d_y(p, q)}{\max_{p, q \in [1, N]} d_y(p, q)} \quad p, q \in [1, N] \quad (S3)$$

## 2.8. Preparation of soil extract samples

The soil extract solution was prepared as follows. 1 g of dried soil was mixed with 40 mL of acetate buffer (0.2 M, pH 5.0) in a glass bottle. The soil suspension was shaken in an end-over-end shaker at room temperature for 24 h. The mixture was centrifuged at a rotation speed of 3000 r/min for 20 min to achieve solid-liquid separation. The supernatant was subjected to ultraviolet photolysis for 10 min in a photolysis tank, obtaining the soil extract solution. The 10 mL of soil extract was transferred into a beaker to conduct SWASV measurement after blowing N<sub>2</sub> gas for 2 min.

**Table S2.** Detailed information on real soil samples.

| Soil sample     | Total contents of heavy metals (mg/kg) |               |        |        | Granularity | Soil pH | Sampling location               |
|-----------------|----------------------------------------|---------------|--------|--------|-------------|---------|---------------------------------|
|                 | Cd                                     | Pb            | Cu     | Zn     |             |         |                                 |
| <b>Sample 1</b> | <b>0.160</b>                           | <b>20.100</b> | 23.300 | 64.200 | <0.099 mm   | 8.450   | Luochuan city, Shaanxi province |
| <b>Sample 2</b> | 0.272                                  | 47.400        | 36.500 | 90.400 | <0.074 mm   | 6.620   | Suzhuo city, Jiangsu province   |

## 3. Results and discussion

### 3.1. Analysis of SWASV Signals and Input Variables

#### 3.1.2. Comparison of Peak Heights and Peak Areas of Multiple HMIs Acquired by Different Methods

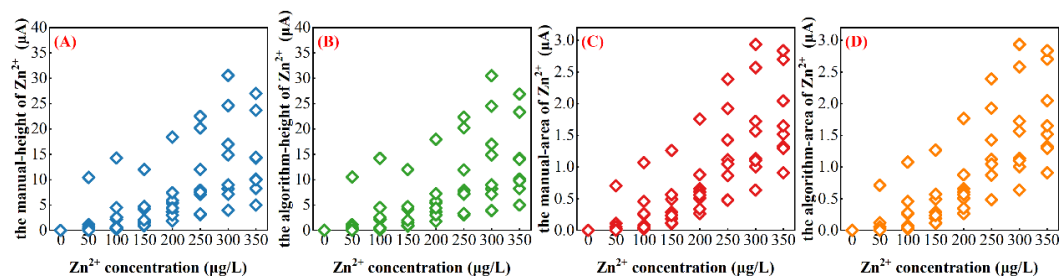

**Figure S3.**  $I_{\text{manu}}$  (A),  $I_{\text{algo}}$  (B),  $A_{\text{manu}}$  (C) and  $A_{\text{algo}}$  (D) of  $\text{Zn}^{2+}$  acquired from the SWASV curves of 64 experiments. (Blue scatters represent the  $I_{\text{manu}}$ , green scatters represent the  $I_{\text{algo}}$ , red scatters represent the  $A_{\text{manu}}$ , orange scatters represent the  $A_{\text{algo}}$ ).

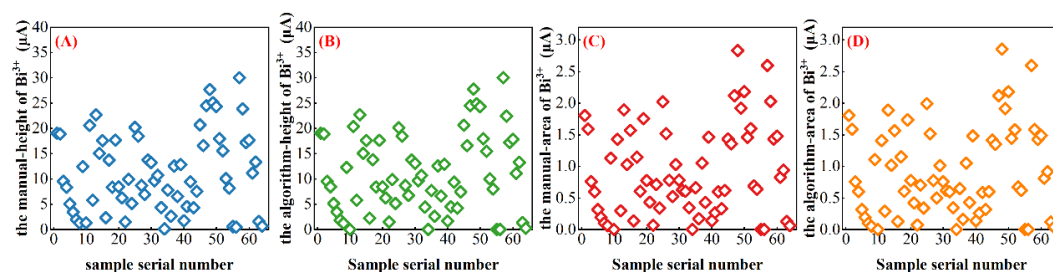

**Figure S4.**  $I_{\text{manu}}$  (A),  $I_{\text{algo}}$  (B),  $A_{\text{manu}}$  (C) and  $A_{\text{algo}}$  (D) of  $\text{Bi}^{3+}$  acquired from the SWASV curves of 64 experiments. (Blue scatters represent the  $I_{\text{manu}}$ , green scatters represent the  $I_{\text{algo}}$ , red scatters represent the  $A_{\text{manu}}$ , orange scatters represent the  $A_{\text{algo}}$ ).

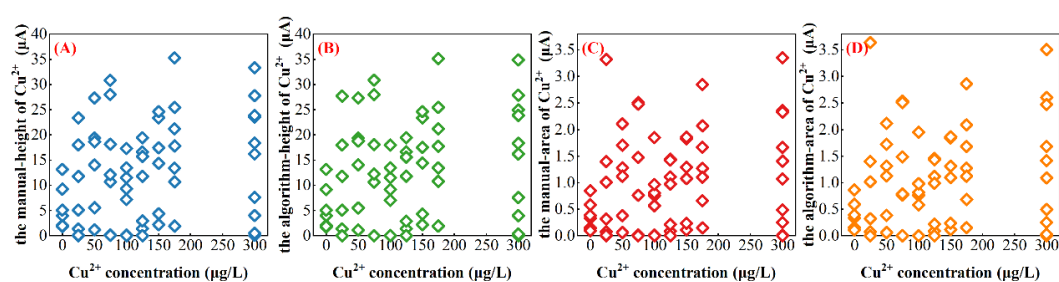

**Figure S5.**  $I_{\text{manu}}$  (A),  $I_{\text{algo}}$  (B),  $A_{\text{manu}}$  (C) and  $A_{\text{algo}}$  (D) of  $\text{Cu}^{2+}$  acquired from the SWASV curves of 64 experiments. (Blue scatters represent the  $I_{\text{manu}}$ , green scatters represent the  $I_{\text{algo}}$ , red scatters represent the  $A_{\text{manu}}$ , orange scatters represent the  $A_{\text{algo}}$ ).

**Table S3.** Detailed  $R^2$  and  $\cos \theta$  of the peak heights and peak areas

| .HMI             | peak heights |               | peak areas |               |
|------------------|--------------|---------------|------------|---------------|
|                  | $R^2$        | $\cos \theta$ | $R^2$      | $\cos \theta$ |
| $\text{Zn}^{2+}$ | 0.9999       | 1.0000        | 1.0000     | 1.0000        |
| $\text{Cd}^{2+}$ | 1.0000       | 1.0000        | 1.0000     | 1.0000        |
| $\text{Pb}^{2+}$ | 0.9998       | 0.9999        | 0.9999     | 1.0000        |
| $\text{Bi}^{3+}$ | 0.9995       | 0.9998        | 0.9970     | 0.9989        |
| $\text{Cu}^{2+}$ | 0.9984       | 0.9993        | 0.9989     | 0.9995        |

### 3.2. Detection of $\text{Cd}^{2+}$ and $\text{Pb}^{2+}$ Concentrations by Peak Heights

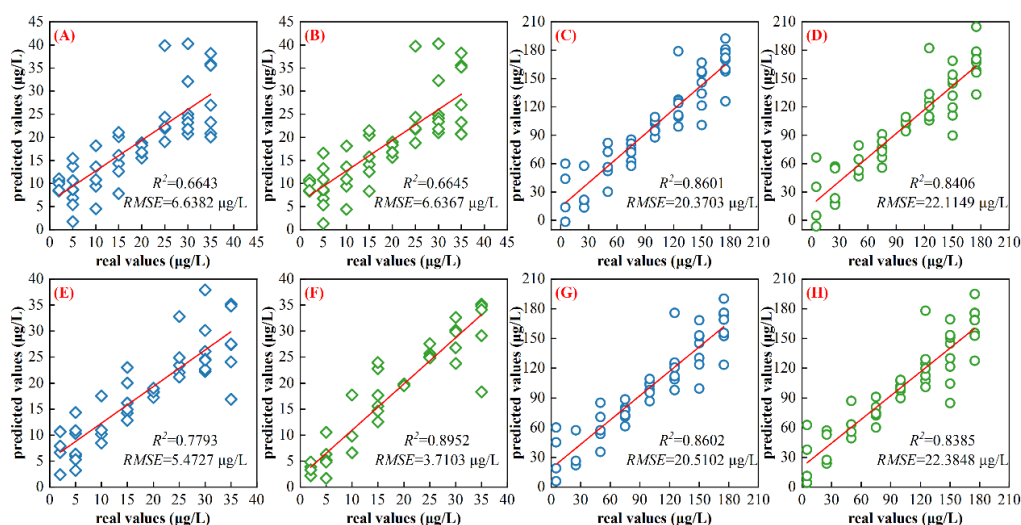

**Figure S6.** PLSR models (A, B, C and D) and SVR models (E, F, G and H) results for  $\text{Cd}^{2+}$  and  $\text{Pb}^{2+}$  concentrations detection in the calibration dataset. (Diamond scatters represent  $\text{Cd}^{2+}$  concentrations, circular scatters represent  $\text{Pb}^{2+}$  concentrations, blue scatters represent the model input as  $I_{\text{manu}}$ , green scatters represent the model input as  $I_{\text{algo}}$ ).

**Table S4.** The  $R^2$  values and RMSE values of the models built by peak heights.

| machine learning model | HMI              | input             | calibration set |        | validation set |        | parameters |        |        |
|------------------------|------------------|-------------------|-----------------|--------|----------------|--------|------------|--------|--------|
|                        |                  |                   | RMSE (µg/L)     | $R^2$  | RMSE (µg/L)    | $R^2$  | c          | g      | mse    |
| PLSR                   | $\text{Cd}^{2+}$ | $I_{\text{manu}}$ | 6.6382          | 0.6643 | 5.4463         | 0.7375 | -          | -      | -      |
|                        |                  | $I_{\text{algo}}$ | 6.6367          | 0.6645 | 5.4838         | 0.7323 | -          | -      | -      |
|                        | $\text{Pb}^{2+}$ | $I_{\text{manu}}$ | 20.3703         | 0.8601 | 19.2392        | 0.8645 | -          | -      | -      |
|                        |                  | $I_{\text{algo}}$ | 22.1149         | 0.8406 | 21.9047        | 0.7766 | -          | -      | -      |
| SVR                    | $\text{Cd}^{2+}$ | $I_{\text{manu}}$ | 5.4727          | 0.7793 | 5.3916         | 0.7650 | 9.0970     | 0.0380 | 0.1857 |
|                        |                  | $I_{\text{algo}}$ | 3.7103          | 0.8952 | 3.9922         | 0.8424 | 9.3231     | 0.1977 | 0.1260 |
|                        | $\text{Pb}^{2+}$ | $I_{\text{manu}}$ | 20.5102         | 0.8602 | 20.0015        | 0.8791 | 343.0406   | 0.0010 | 0.0605 |
|                        |                  | $I_{\text{algo}}$ | 22.3848         | 0.8385 | 21.3431        | 0.8229 | 239.3599   | 0.0010 | 0.0762 |

### 3.3. Detection of $\text{Cd}^{2+}$ and $\text{Pb}^{2+}$ Concentrations by Peak Areas

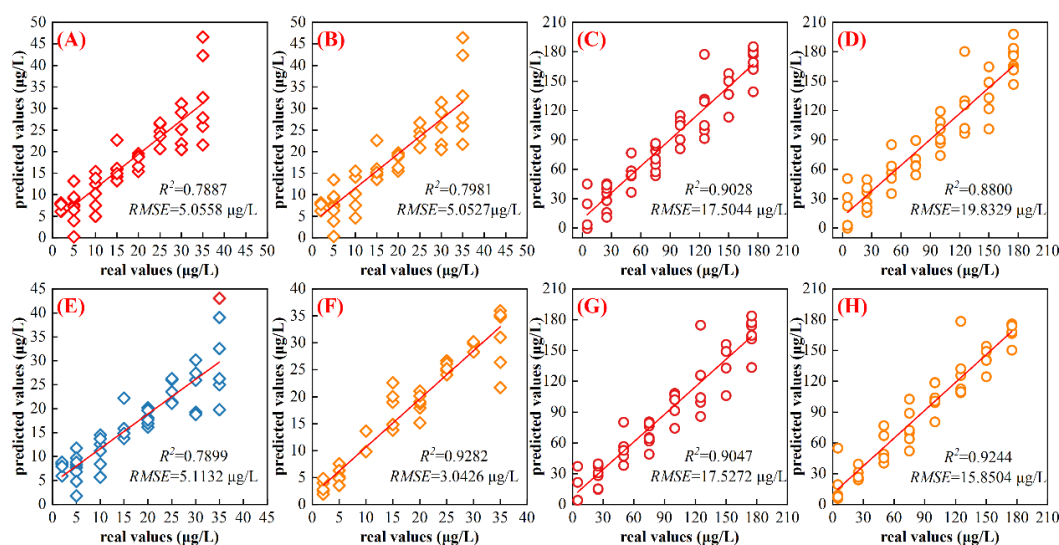

**Figure S7.** PLSR models (A, B, C and D) and SVR models (E, F, G and H) results for  $\text{Cd}^{2+}$  and  $\text{Pb}^{2+}$  concentrations detection in the calibration dataset. (Diamond scatters represent  $\text{Cd}^{2+}$  concentrations,

circular scatters represent  $Pb^{2+}$  concentrations, red scatters represent the model input as  $A_{manu}$ , orange scatters represent  $A_{algo}$  as the model input.).

**Table S5.** The  $R^2$  values and RMSE values of the models.

| machine learning model | HMI's input |       | calibration set          |        | validation set           |        | parameters |        |        |
|------------------------|-------------|-------|--------------------------|--------|--------------------------|--------|------------|--------|--------|
|                        |             |       | RMSE ( $\mu\text{g/L}$ ) | $R^2$  | RMSE ( $\mu\text{g/L}$ ) | $R^2$  | c          | g      | mse    |
| PLSR                   | $Cd^{2+}$   | Imanu | 5.0558                   | 0.7887 | 3.8996                   | 0.8828 | -          | -      | -      |
|                        |             | Ialgo | 5.0527                   | 0.7981 | 3.7414                   | 0.891  | -          | -      | -      |
|                        | $Pb^{2+}$   | Imanu | 17.5044                  | 0.9028 | 15.1333                  | 0.9272 | -          | -      | -      |
|                        |             | Ialgo | 19.8329                  | 0.8800 | 12.9264                  | 0.9668 | -          | -      | -      |
| SVR                    | $Cd^{2+}$   | Imanu | 5.1132                   | 0.7899 | 3.9824                   | 0.8785 | 400.0000   | 0.0010 | 0.1312 |
|                        |             | Ialgo | 3.0426                   | 0.9282 | 2.9906                   | 0.9204 | 18.5183    | 0.1254 | 0.0795 |
|                        | $Pb^{2+}$   | Imanu | 17.5272                  | 0.9047 | 13.3444                  | 0.9359 | 1000.0000  | 0.0010 | 0.0503 |
|                        |             | Ialgo | 15.8504                  | 0.9244 | 13.1574                  | 0.9756 | 1.1370     | 0.1736 | 0.0655 |

### 3.5. Application of $A_{algo}$ -SVR for Detecting $Cd^{2+}$ and $Pb^{2+}$ Concentrations in Soil Extract Solution

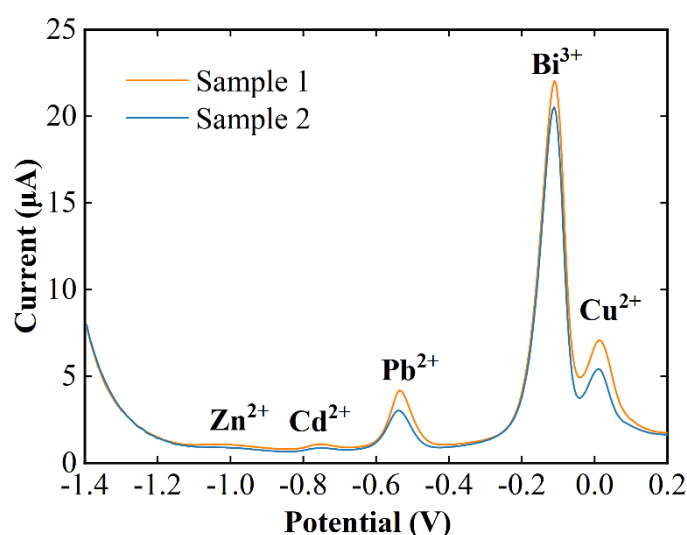

**Figure S8.** SWASV response curves of soil extract samples.

## References:

1. Liu, N., Ye, W., Liu, G., Zhao, G., 2022a. Improving the accuracy of stripping voltammetry detection of  $cd^{2+}$  and  $pb^{2+}$  in the presence of  $cu^{2+}$  and  $zn^{2+}$  by machine learning: understanding and inhibiting the interactive interference among multiple heavy metals. *Anal. Chim. Acta* 1213, 339956.
2. Li, X., Fan, P., Li, Z., Chen, G., Qiu, H., Hou, G., 2021. Soil classification based on deep learning algorithm and visible near-infrared spectroscopy. *J. Spectrosc.* 2021, 1-11.
3. Ferreira, R.D.A., Teixeira, G., Peternelli, L.A., 2022. Kennard-stone method outperforms the random sampling in the selection of calibration samples in snps and nir data. *Ciência Rural* 52(5).
4. He, Z., Song, S., Shen, K., Zhang, X., 2022. Performance enhancement - based active learning sample selection method. *J. Chemometr.* 36(3).
5. Wang, S.F., Han, P., Cui, G.L., Wang, D., Liu, S.S., Zhao, Y., 2019. The nir detection research of soluble solid content in watermelon based on spxy algorithm. *Spectrosc. Spect. Anal.* 39(3), 738-742.
